# Supplementary material for: Providing laypeople with results from dynamic infectious disease modelling studies affects their allocation preference for scarce medical resources—a factorial experiment
Source: Springer Nature journal article supplement (doi:10.1186/s12889-022-13000-7), 2022-03-23
Supplement: MOESM2 [file 20247342]

## Additional File 2 – Baseline demographic characteristics for each group within the scenario “prevention”

Data are medians (25th percentile, 75th percentile) or numbers (%)

|                                             | All<br>(n = 441)     | Time until death                     |                                       | Information on population-level effects |                                                       |                                                       |
|---------------------------------------------|----------------------|--------------------------------------|---------------------------------------|-----------------------------------------|-------------------------------------------------------|-------------------------------------------------------|
|                                             |                      | Death within<br>5 years<br>(n = 227) | Death within<br>15 years<br>(n = 214) | No info<br>(n = 149)                    | Additional info<br>compared to<br>10,000<br>(n = 144) | Additional info<br>compared to<br>20,000<br>(n = 148) |
| Age (years)                                 | 51.0<br>(38.4, 58.0) | 50.5<br>(41.9, 58.0)                 | 51.0<br>(37.9, 59.0)                  | 52.0<br>(42.0, 58.0)                    | 48.0<br>(36.4, 58.0)                                  | 51.0<br>(38.2, 59.0)                                  |
| Female                                      | 287 (65.2)           | 142 (62.8)                           | 145 (67.8)                            | 101 (67.8)                              | 88 (61.1)                                             | 98 (66.7)                                             |
| <b>Highest completed educational level</b>  |                      |                                      |                                       |                                         |                                                       |                                                       |
| Lower secondary education or apprenticeship | 121 (28.0)           | 58 (26.1)                            | 63 (30.0)                             | 44 (29.7)                               | 36 (25.5)                                             | 41 (28.7)                                             |
| Still at upper secondary school             | 7 (1.6)              | 4 (1.8)                              | 3 (1.4)                               | 0 (0)                                   | 5 (3.5)                                               | 2 (1.4)                                               |
| University entrance qualification           | 123 (28.5)           | 68 (30.6)                            | 55 (26.2)                             | 46 (31.1)                               | 35 (24.8)                                             | 42 (29.4)                                             |
| University degree                           | 181 (41.9)           | 92 (41.4)                            | 89 (42.4)                             | 58 (39.2)                               | 65 (46.1)                                             | 58 (40.6)                                             |
| <b>Marital status</b>                       |                      |                                      |                                       |                                         |                                                       |                                                       |
| Married                                     | 250 (58.1)           | 134 (60.9)                           | 116 (55.2)                            | 93 (63.3)                               | 74 (52.5)                                             | 83 (58.5)                                             |
| Unmarried                                   | 128 (29.8)           | 58 (26.4)                            | 70 (33.3)                             | 40 (27.2)                               | 47 (33.3)                                             | 41 (28.9)                                             |
| Divorced                                    | 40 (9.3)             | 24 (10.9)                            | 16 (7.6)                              | 10 (6.8)                                | 16 (11.3)                                             | 14 (9.9)                                              |
| Widowed                                     | 12 (2.8)             | 4 (1.8)                              | 8 (3.8)                               | 4 (2.7)                                 | 4 (2.8)                                               | 4 (2.8)                                               |
