# Supplementary material for: Providing laypeople with results from dynamic infectious disease modelling studies affects their allocation preference for scarce medical resources—a factorial experiment
Source: Springer Nature journal article supplement (doi:10.1186/s12889-022-13000-7), 2022-03-23
Supplement: MOESM3 [file 20247342]

### Additional File 3 – Baseline demographic characteristics for each group within the scenario “treatment”

Data are medians (25th percentile, 75th percentile) or numbers (%)

|                                             | All<br>(n = 437)     | Time until death                     |                                       | Information on population-level effects |                                                       |                                                       |
|---------------------------------------------|----------------------|--------------------------------------|---------------------------------------|-----------------------------------------|-------------------------------------------------------|-------------------------------------------------------|
|                                             |                      | Death within<br>5 years<br>(n = 231) | Death within<br>15 years<br>(n = 206) | No info<br>(n = 144)                    | Additional info<br>compared to<br>10,000<br>(n = 146) | Additional info<br>compared to<br>20,000<br>(n = 147) |
| Age (years)                                 | 51.0<br>(39.0, 60.0) | 51.0<br>(39.9, 61.0)                 | 51.0<br>(37.7, 60.0)                  | 52.0<br>(42.0, 60.0)                    | 51.0<br>(37.0, 62.0)                                  | 50.0<br>(37.0, 60.0)                                  |
| Female                                      | 239 (54.9)           | 122 (53.0)                           | 117 (57.1)                            | 87 (60.4)                               | 79 (54.5)                                             | 73 (50.0)                                             |
| <b>Highest completed educational level</b>  |                      |                                      |                                       |                                         |                                                       |                                                       |
| Lower secondary education or apprenticeship | 123 (29.1)           | 64 (28.4)                            | 59 (29.9)                             | 43 (31.6)                               | 52 (36.1)                                             | 28 (19.7)                                             |
| Still at upper secondary school             | 11 (2.6)             | 3 (1.3)                              | 8 (4.1)                               | 3 (2.2)                                 | 5 (3.5)                                               | 3 (2.1)                                               |
| University entrance qualification           | 102 (24.2)           | 49 (21.8)                            | 53 (26.9)                             | 31 (22.8)                               | 34 (23.6)                                             | 37 (26.1)                                             |
| University degree                           | 186 (44.1)           | 109 (48.4)                           | 77 (39.1)                             | 59 (43.4)                               | 53 (36.8)                                             | 74 (52.1)                                             |
| <b>Marital status</b>                       |                      |                                      |                                       |                                         |                                                       |                                                       |
| Married                                     | 268 (63.5)           | 143 (63.6)                           | 125 (63.5)                            | 90 (66.2)                               | 90 (62.5)                                             | 88 (62.0)                                             |
| Unmarried                                   | 116 (27.5)           | 63 (28.0)                            | 53 (26.9)                             | 33 (24.3)                               | 38 (26.4)                                             | 45 (31.7)                                             |
| Divorced                                    | 28 (6.6)             | 14 (6.2)                             | 14 (7.1)                              | 9 (6.6)                                 | 11 (7.6)                                              | 8 (5.6)                                               |
| Widowed                                     | 10 (2.4)             | 5 (2.2)                              | 5 (2.5)                               | 4 (2.9)                                 | 5 (3.5)                                               | 1 (0.7)                                               |
