# Supplementary material for: Providing laypeople with results from dynamic infectious disease modelling studies affects their allocation preference for scarce medical resources—a factorial experiment
Source: Springer Nature journal article supplement (doi:10.1186/s12889-022-13000-7), 2022-03-23
Supplement: MOESM4 [file 20247342]

## Additional File 4 – Result of the structured content analysis

| Category                                                                                         | Example                                                                                                                                                                                                                                                                                                                                                                                                                       | % in scenario<br>“prevention” *<br>(n = 383) | % in scenario<br>“treatment” *<br>(n = 345) |
|--------------------------------------------------------------------------------------------------|-------------------------------------------------------------------------------------------------------------------------------------------------------------------------------------------------------------------------------------------------------------------------------------------------------------------------------------------------------------------------------------------------------------------------------|----------------------------------------------|---------------------------------------------|
| <b>1. Justice – stigma vs. personal responsibility</b>                                           |                                                                                                                                                                                                                                                                                                                                                                                                                               | 24.8                                         | 26.6                                        |
| <b>a. Equal treatment</b>                                                                        | <ul style="list-style-type: none"> <li>“I don't want to play younger people off against older people, nor do I want to play sick people off against healthy people.”</li> </ul>                                                                                                                                                                                                                                               | 11.0                                         | 14.8                                        |
| <b>b. Personal responsibility</b>                                                                | <ul style="list-style-type: none"> <li>“People must also do something for their health and therefore make conscious decisions in order to maintain their own health.”</li> </ul>                                                                                                                                                                                                                                              | 9.7                                          | 8.1                                         |
| <b>c. Condemnation of a particular lifestyle</b>                                                 | <ul style="list-style-type: none"> <li>“Priority to decency and morality”</li> <li>“Healthy lifestyle has to be rewarded”</li> </ul>                                                                                                                                                                                                                                                                                          | 6.0                                          | 5.8                                         |
| <b>2. Utilitarianism</b>                                                                         |                                                                                                                                                                                                                                                                                                                                                                                                                               | 63.4                                         | 47.8                                        |
| <b>a. Minimize risks/number of deaths or preserve years of life/number of people</b>             | <ul style="list-style-type: none"> <li>“Because then very few people die”</li> <li>“Because that's how most people survive”</li> </ul>                                                                                                                                                                                                                                                                                        | 59.5                                         | 45.8                                        |
| <b>b. Benefits for society</b>                                                                   | <ul style="list-style-type: none"> <li>“Mr. Spock: the well-being of many is more important than the well-being of the individual”</li> <li>“And if you look at it economically, a young person is a fresh worker.”</li> </ul>                                                                                                                                                                                                | 5.7                                          | 5.2                                         |
| <b>3. No decision for a specific group</b>                                                       |                                                                                                                                                                                                                                                                                                                                                                                                                               | 13.3                                         | 19.1                                        |
| <b>a. Incorrect allocation due to lack of control</b>                                            | <ul style="list-style-type: none"> <li>“It is difficult to see who really has only one sexual partner or changing sexual partners [...] and those who can lie well may get away with it.”</li> </ul>                                                                                                                                                                                                                          | 2.6                                          | 1.4                                         |
| <b>b. Burden of responsibility / general decision not reasonable / no fair solution possible</b> | <ul style="list-style-type: none"> <li>“Experts such as doctors, researchers and politicians should develop a concept and then implement it.”</li> <li>“I do not want to judge which person “deserves” the vaccination or not!”</li> <li>“In such a case, individual medically justified solutions should be sought. General decisions according to age or behaviour (?) are always doubtful and not justifiable.”</li> </ul> | 10.7                                         | 17.7                                        |
| <b>4. Other reason</b>                                                                           |                                                                                                                                                                                                                                                                                                                                                                                                                               | 8.6                                          | 17.7                                        |

\* A single statement could be assigned to several subcategories.
