# Supplementary material for: Providing laypeople with results from dynamic infectious disease modelling studies affects their allocation preference for scarce medical resources—a factorial experiment
Source: Springer Nature journal article supplement (doi:10.1186/s12889-022-13000-7), 2022-03-23
Supplement: MOESM5 [file 20247342]

**Additional File 5 – Relative frequencies (%) of choice of allocation scheme in the two scenarios stratified by the randomization factor “model-based information on expected population-level effects”**

|                                        | Prevention<br>(p < 0.001) |                                                      |                                                | Treatment<br>(p = 0.03) |                                                      |                                                |
|----------------------------------------|---------------------------|------------------------------------------------------|------------------------------------------------|-------------------------|------------------------------------------------------|------------------------------------------------|
|                                        | No info<br>(n = 149)      | Additional info:<br>10,000 deaths<br>(n = 144)       | Additional info:<br>20,000 deaths<br>(n = 148) | No info<br>(n = 144)    | Additional info:<br>10,000 deaths<br>(n = 146)       | Additional info:<br>20,000 deaths<br>(n = 147) |
|                                        |                           | p = 0.80 among participants<br>who received any info |                                                |                         | p = 0.76 among participants<br>who received any info |                                                |
| <b>Random allocation</b>               | 12.8                      | 11.8                                                 | 12.2                                           | 8.3                     | 4.1                                                  | 7.5                                            |
| <b>First come, first served</b>        |                           |                                                      |                                                | 27.1                    | 21.2                                                 | 17.7                                           |
| <b>Young individuals first</b>         | 22.1                      | 6.2                                                  | 8.8                                            | 11.1                    | 8.9                                                  | 7.5                                            |
| <b>Promiscuous individuals first</b>   | 34.2                      | 54.9                                                 | 49.3                                           | 12.5                    | 28.1                                                 | 32.0                                           |
| <b>Long-lasting partnerships first</b> | 16.8                      | 11.1                                                 | 10.1                                           | 9.7                     | 10.3                                                 | 8.8                                            |
| <b>Undecided</b>                       | 14.1                      | 16.0                                                 | 19.6                                           | 31.2                    | 27.4                                                 | 26.5                                           |
