# Supplementary material for: Providing laypeople with results from dynamic infectious disease modelling studies affects their allocation preference for scarce medical resources—a factorial experiment
Source: Springer Nature journal article supplement (doi:10.1186/s12889-022-13000-7), 2022-03-23

**Additional File 6 – Relative frequencies (%) of choice of allocation scheme in the two scenarios stratified by the randomization factors “time until death” and “model-based information on expected population-level effects”**

Factor "time until death"  Death within 5 years  Death within 15 years

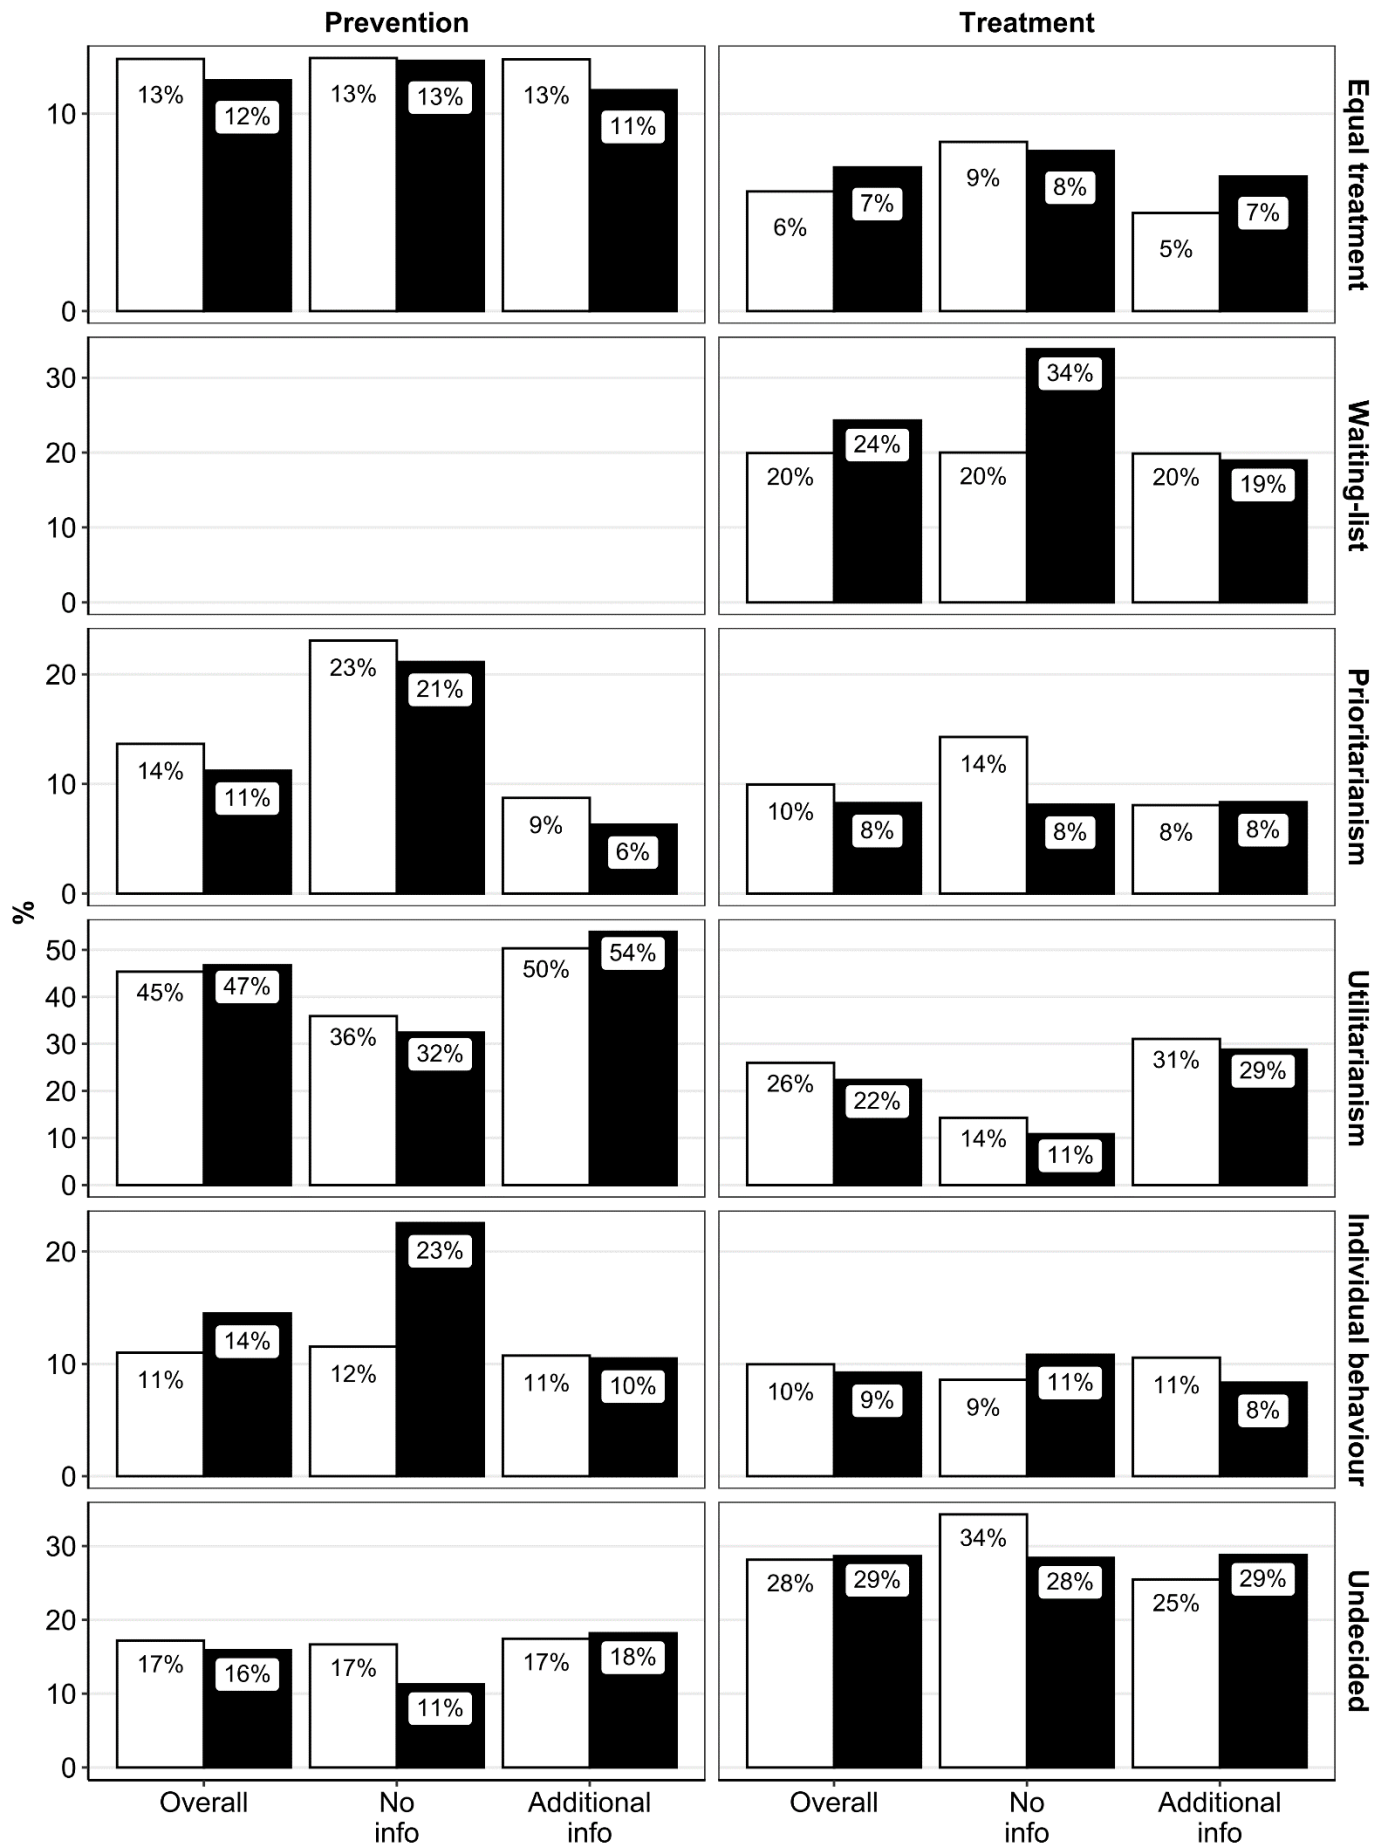

Supplement: MOESM6 [file 20247342]
