# Supplementary material for: Providing laypeople with results from dynamic infectious disease modelling studies affects their allocation preference for scarce medical resources—a factorial experiment
Source: Springer Nature journal article supplement (doi:10.1186/s12889-022-13000-7), 2022-03-23

**Additional File 7 – Relative frequencies (%) of choice of allocation scheme in the two scenarios stratified by highest completed educational level and the randomization factor “model-based information on expected population-level effects”**

University degree  No  Yes

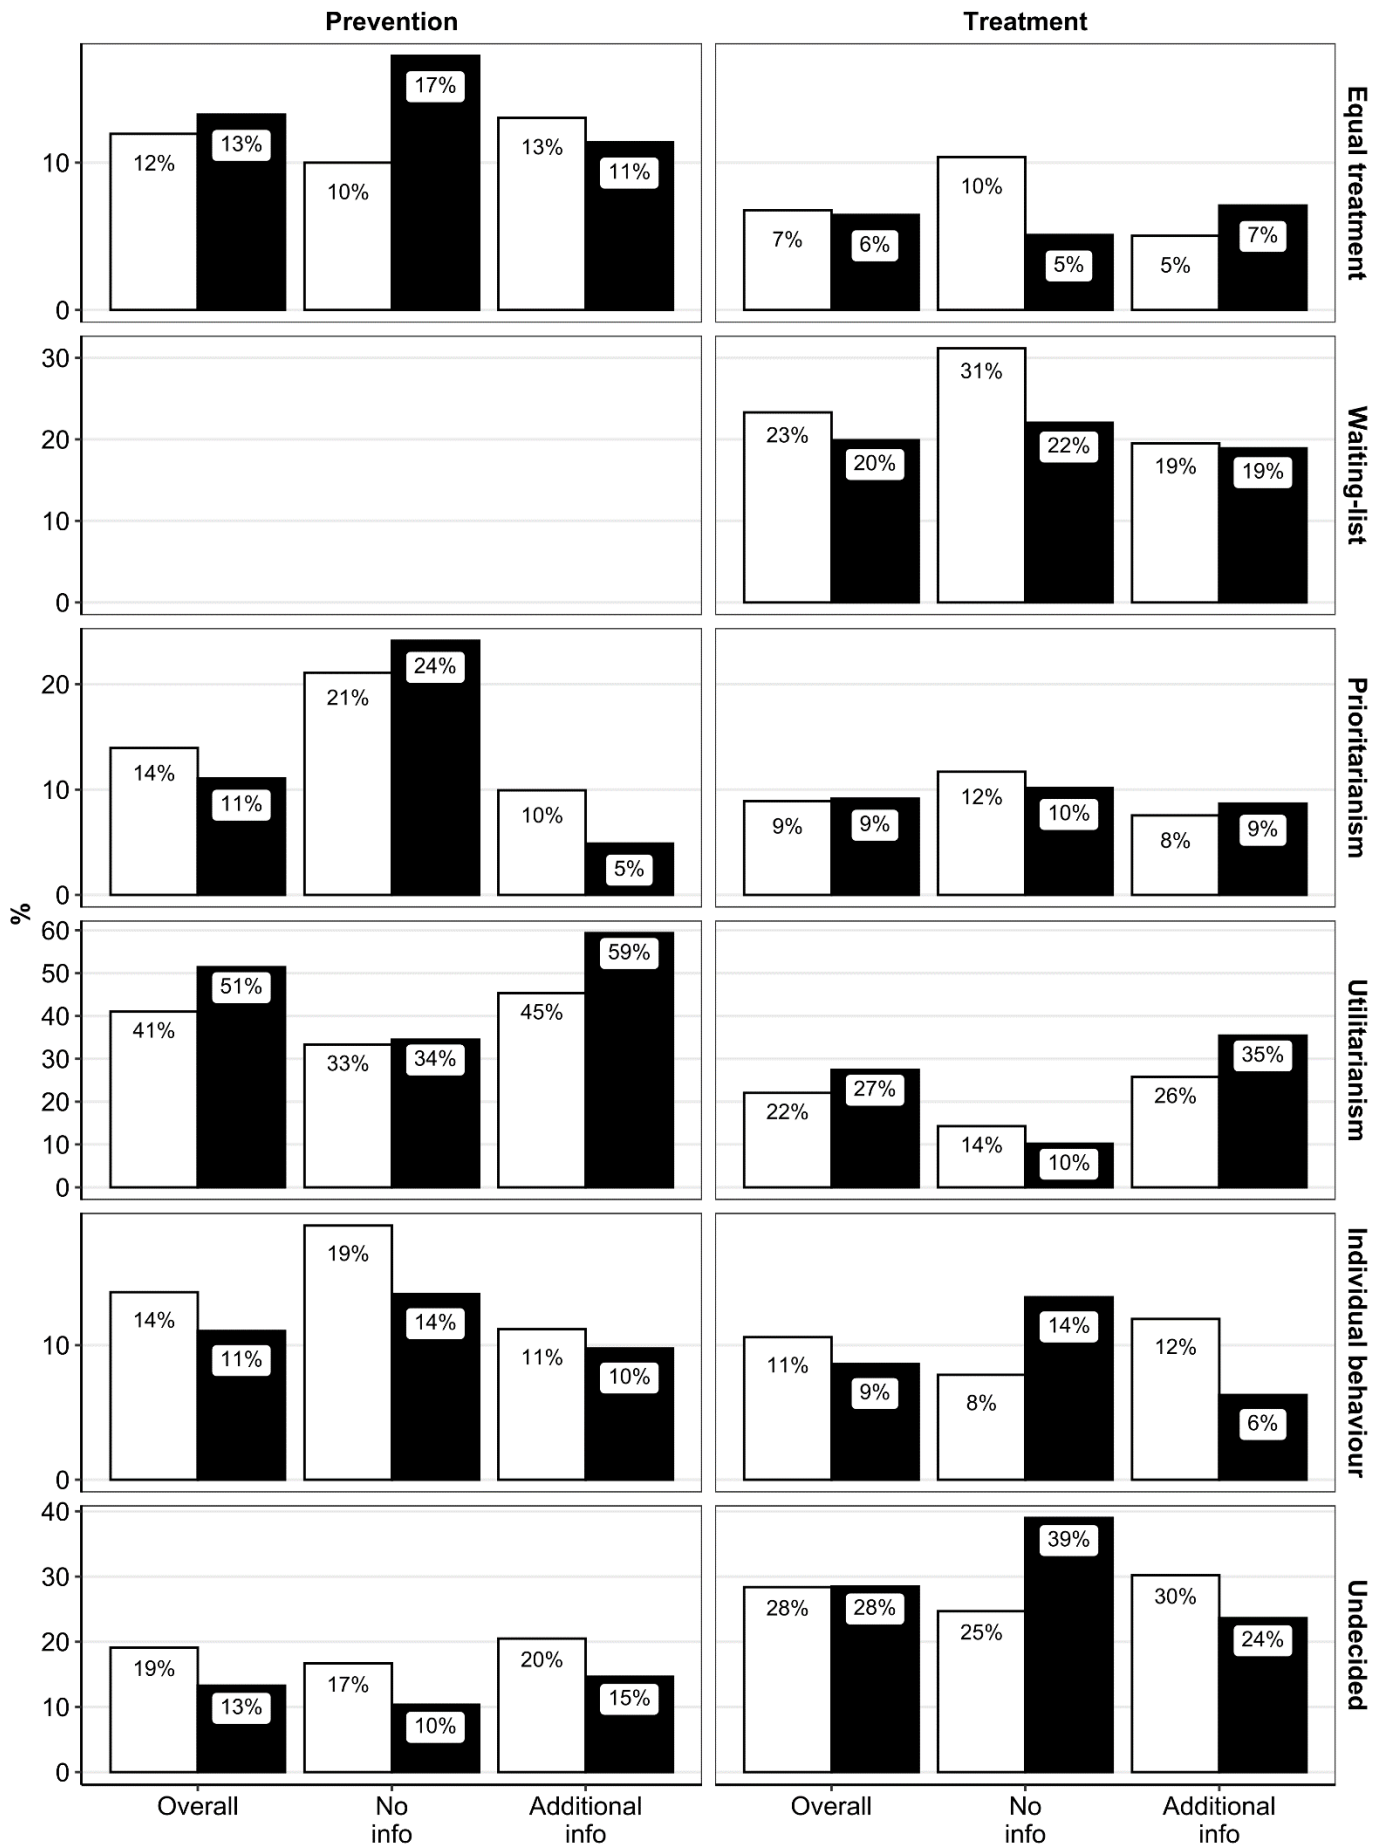

Supplement: MOESM7 [file 20247342]
